# Supplementary material for: Design, Synthesis, and Antiproliferative Activity of Selective Histone Deacetylases 6 Inhibitors Containing a Tetrahydropyridopyrimidine Scaffold
Source: MDPI journal article supplement (doi:10.3390/molecules28217323), 2023-10-29

# Supporting Information for

## Design, Synthesis, and Antiproliferative Activity of Selective Histone Deacetylases 6 Inhibitors Containing a Tetrahydropyridopyrimidine Scaffold

$^1\text{H}$ -NMR,  $^{13}\text{C}$ -NMR and HR-MS spectras of synthesized compounds of **8a–h** (Page1-8)

8-(2, 4-diphenyl-5, 8-dihydropyrido[3, 4-*d*]pyrimidin-7(6*H*)-yl)-*N*-hydroxy-8-oxooctanamide (**8a**)

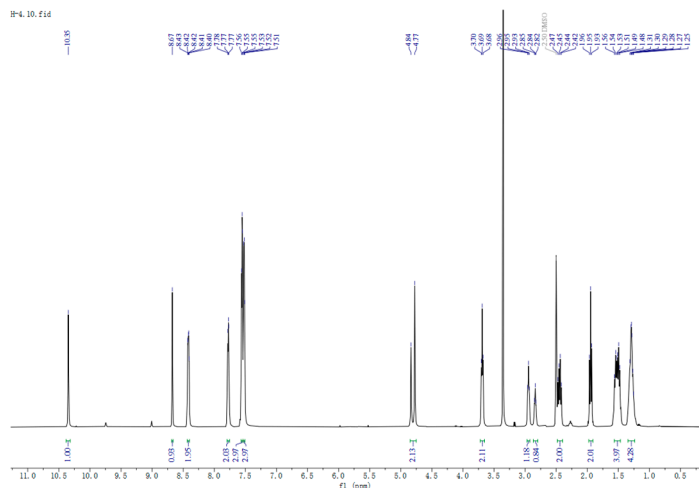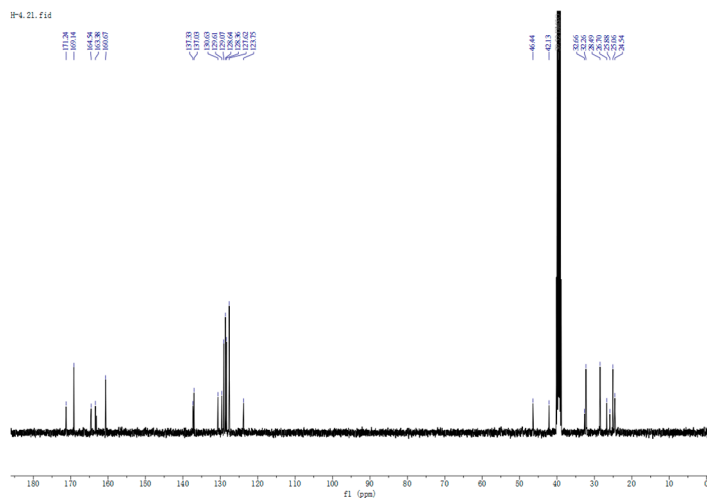

CCYXZ20230614-1 #23 RT: 0.11 AV: 1 NL: 4.76E9  
T: FTMS + p ESI Full ms [100.0000-1500.0000]

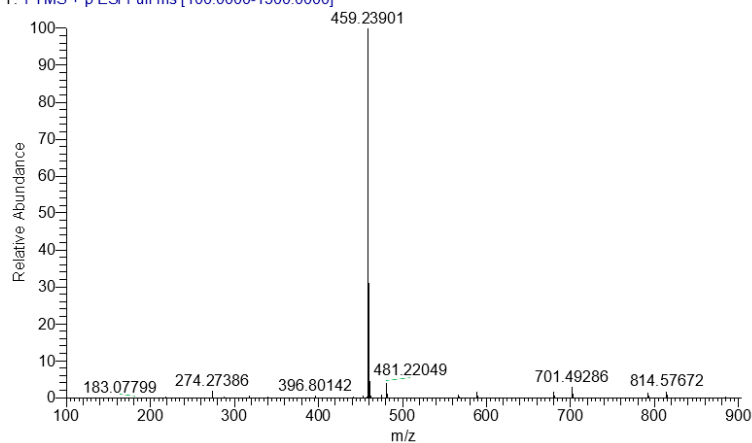

## H-10, 10, fid

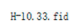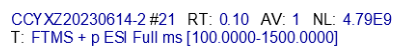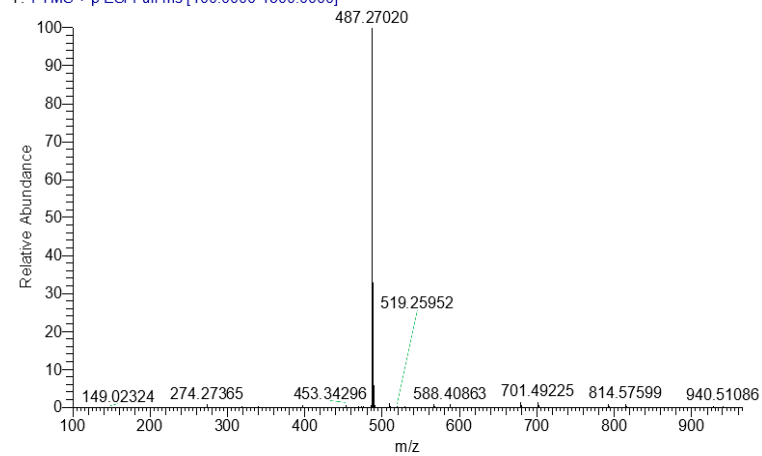

8-(2, 4-bis(4-methoxyphenyl)-5, 8-dihydropyrido[3, 4-*d*]pyrimidin-7(6*H*)-yl)-*N*-hydroxy-8-oxooctanamide (**8c**)

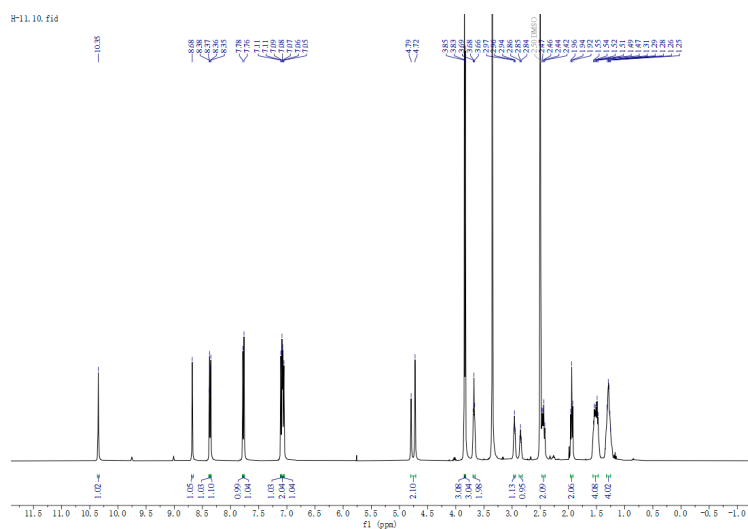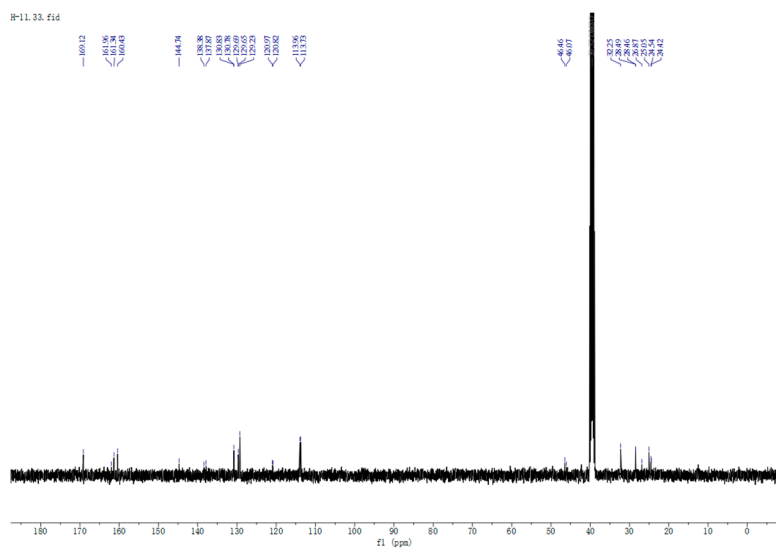

CCYXZ20230614-3 #26 RT: 0.12 AV: 1 NL: 3.57E9  
T: FTMS + p ESI Full ms [100.0000-1500.0000]

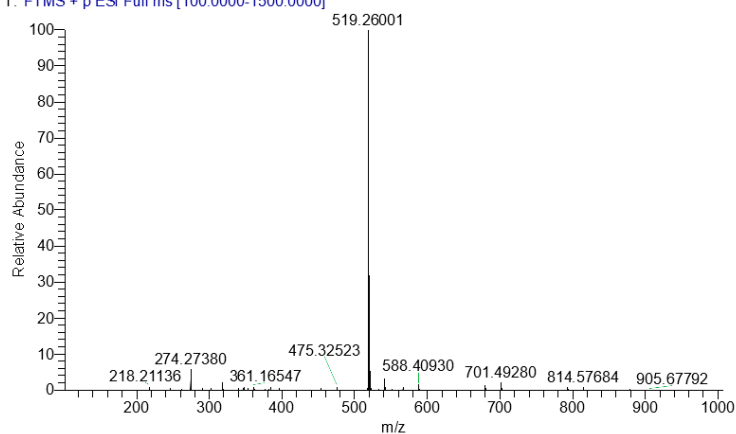

8-(2, 4-di(furan-3-yl)-5, 8-dihydropyrido[3, 4-*d*]pyrimidin-7(6*H*)-yl)-*N*-hydroxy-8-oxooctanamide (**8d**)

H-20.10.fid

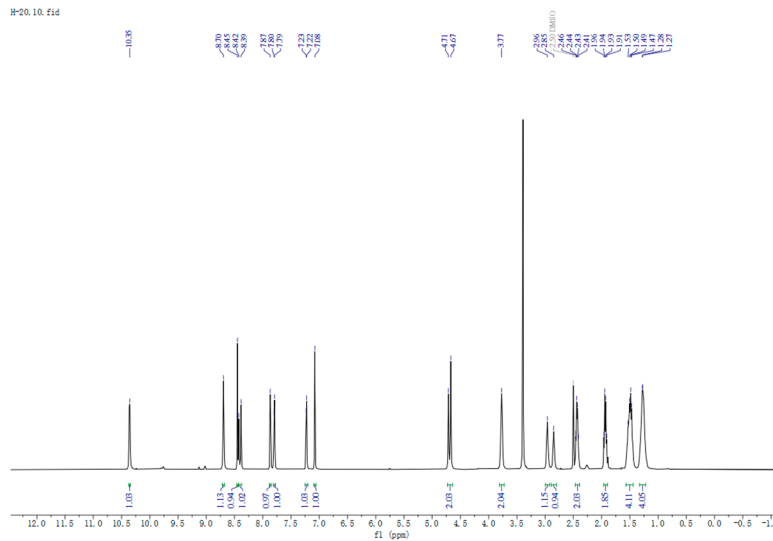

H-20.33.fid

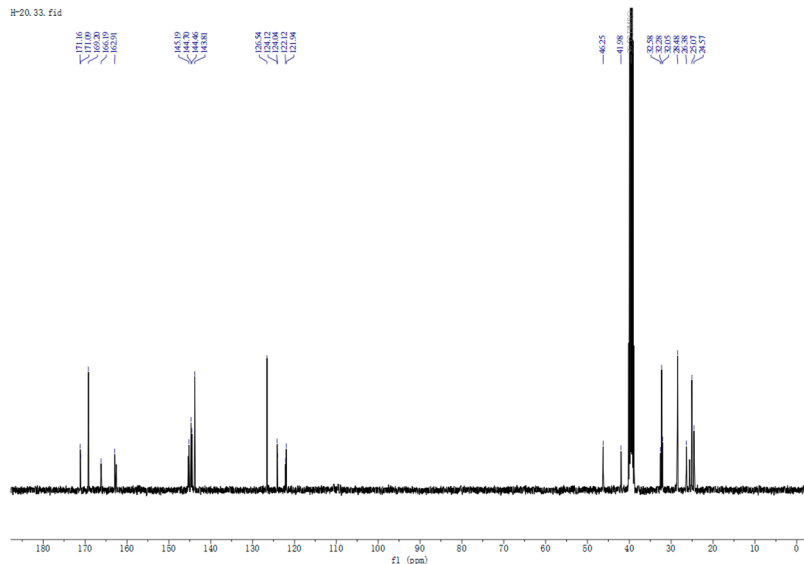

CCYXZ20230614-4 #34 RT: 0.15 AV: 1 NL: 6.90E9  
T: FTMS + p ESI Full ms [100.0000-1500.0000]

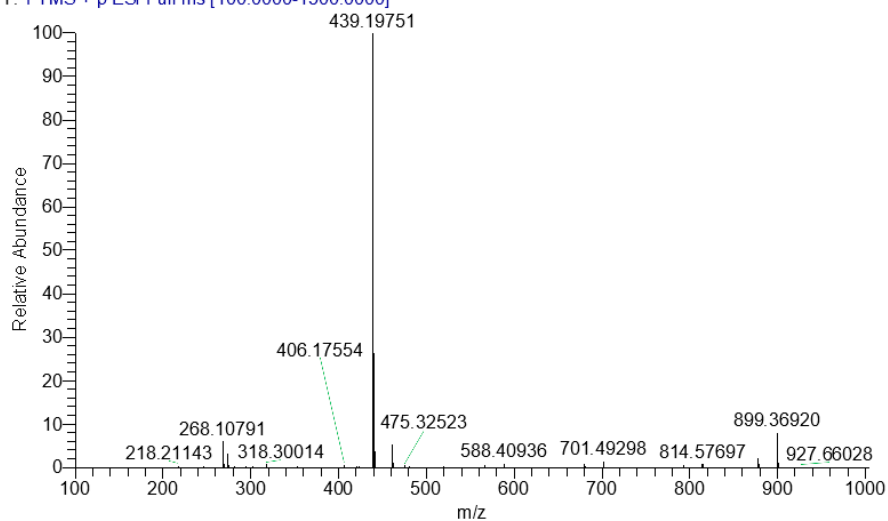

## H-22.10.fid

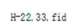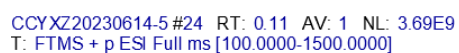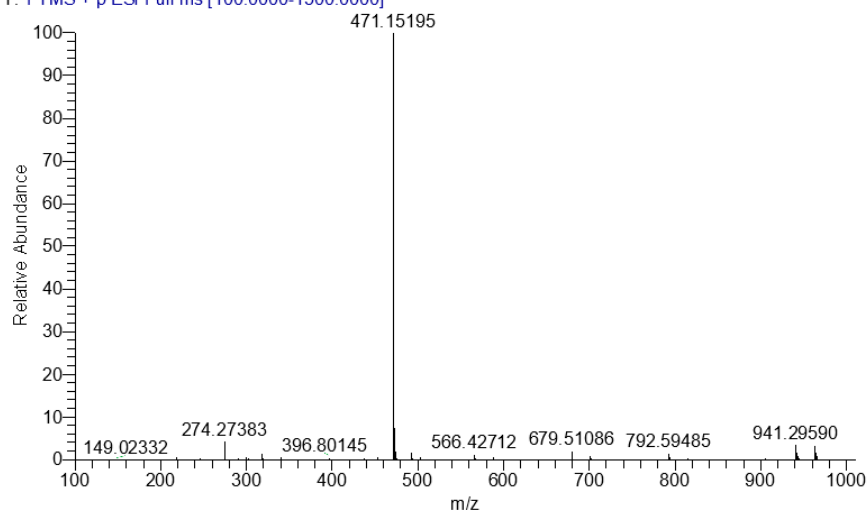

8-(2, 4-bis(3-methoxyphenyl)-5, 8-dihydropyrido[3, 4-*d*]pyrimidin-7(6*H*)-yl)-*N*-hydroxy-8-oxooctanamide (**8f**)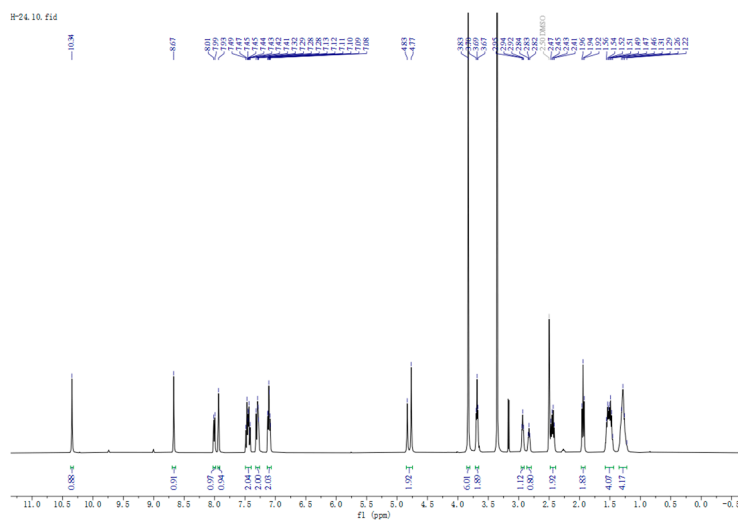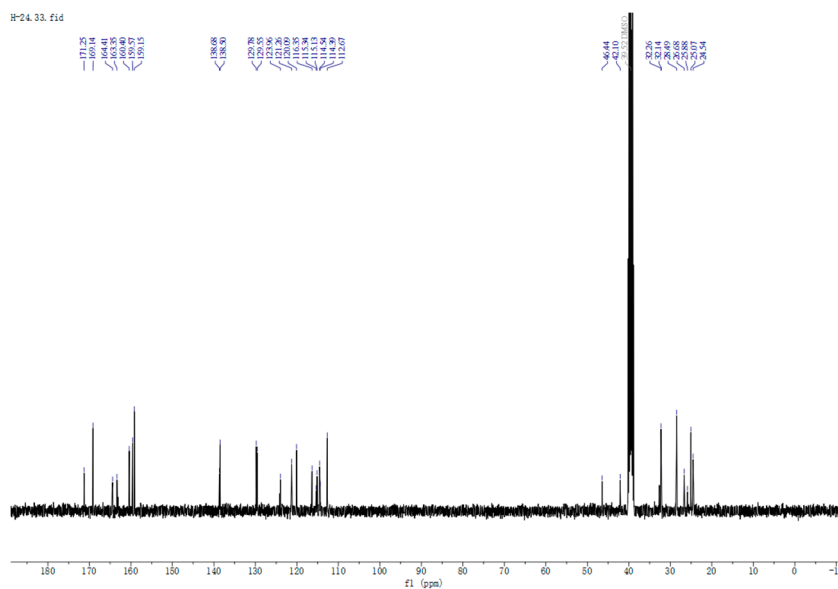

CCYXZ20230614-6 #25 RT: 0.11 AV: 1 NL: 2.71E9  
T: FTMS + p ESI Full ms [100.0000-1500.0000]

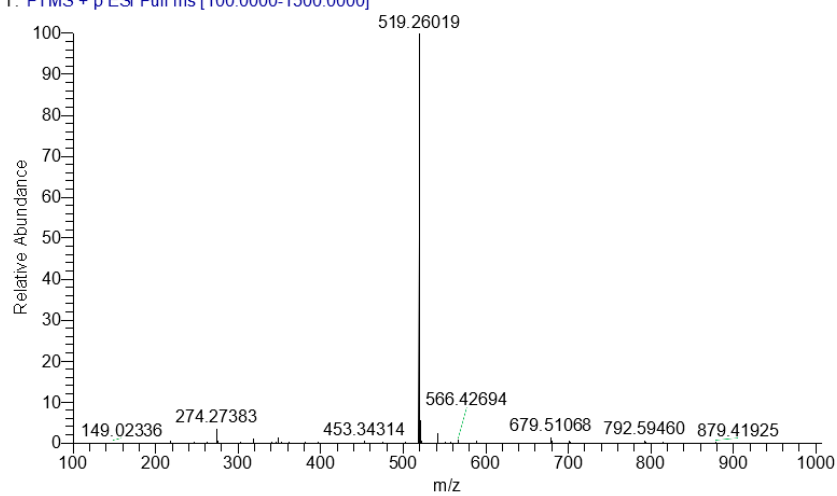

8-(2, 4-di(thiophen-2-yl)-5, 8-dihydropyrido[3, 4-d]pyrimidin-7(6*H*)-yl)-*N*-hydroxy-8-oxooctanamide (**8g**)

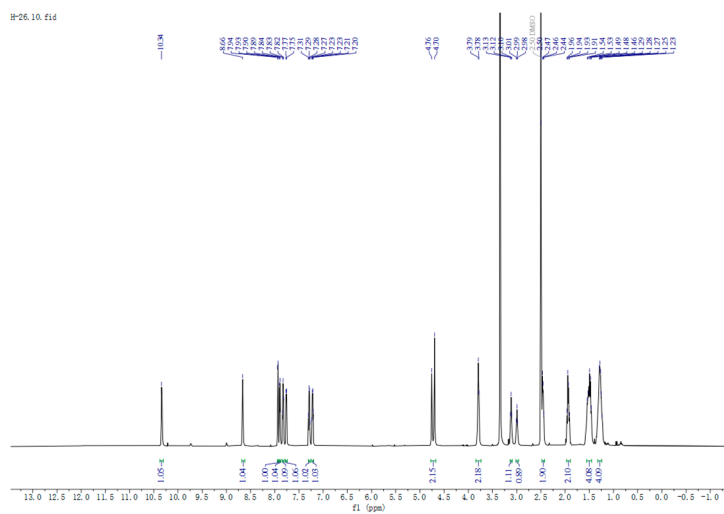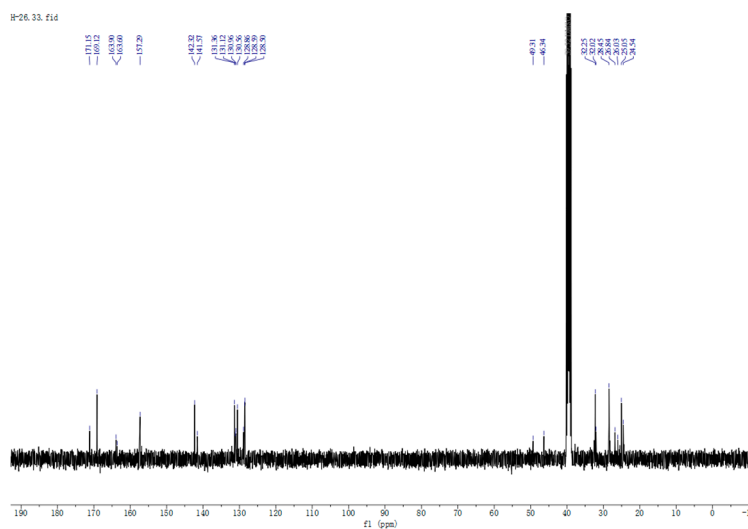

CCYXZ20230614-7\_20230614120608 #122 RT: 0.55 AV: 1 NL: 6.04E8  
T: FTMS + p ESI Full ms [100.0000-1500.0000]

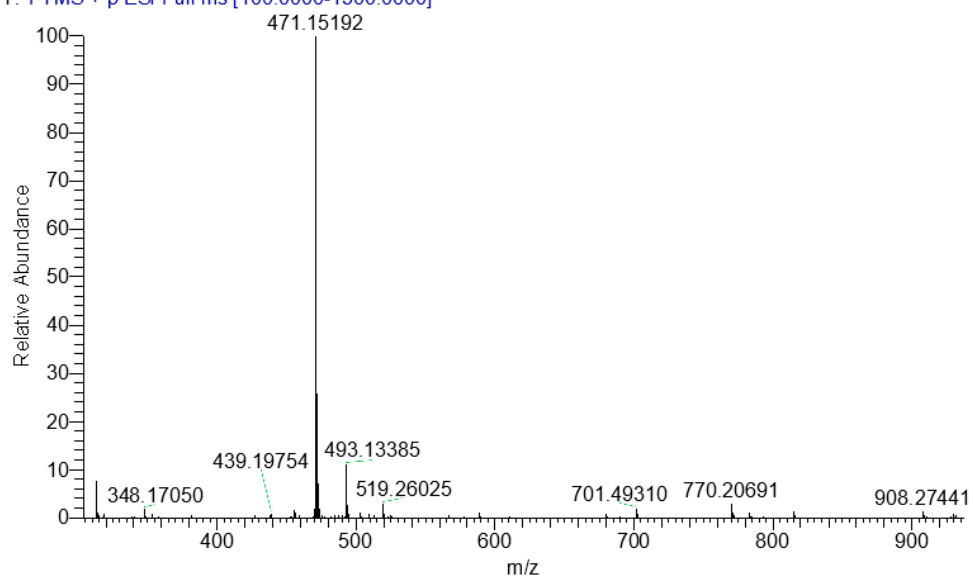

8-(2, 4-bis(4-(trifluoromethyl)phenyl)-5, 8-dihydropyrido[3, 4-*d*]pyrimidin-7(6*H*)-yl)-*N*-hydroxy-8-oxooctanamide  
(8h)

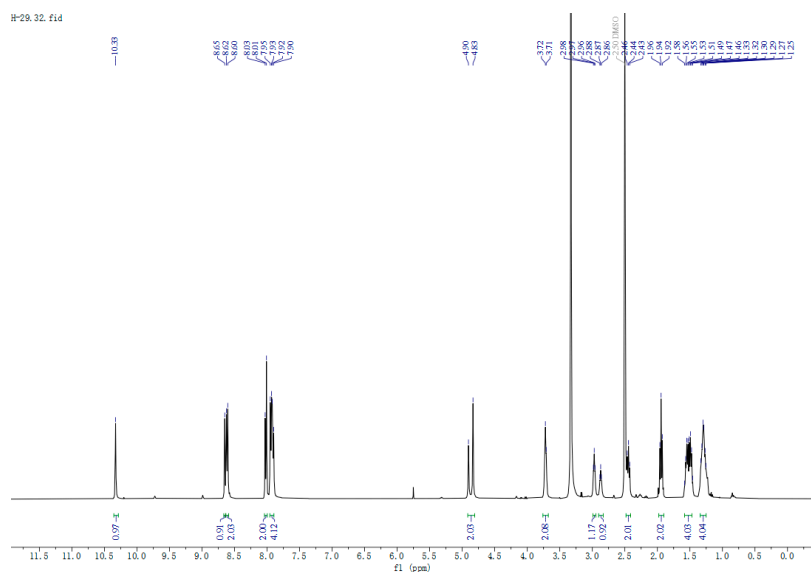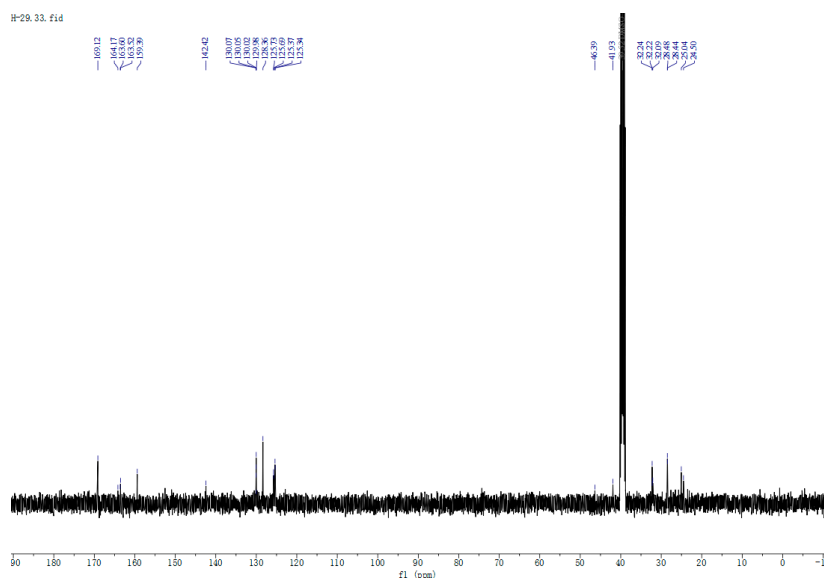

CCYXZ20230614-8 #28 RT: 0.13 AV: 1 NL: 1.69E9  
T: FTMS + p ESI Full ms [100.0000-1500.0000]

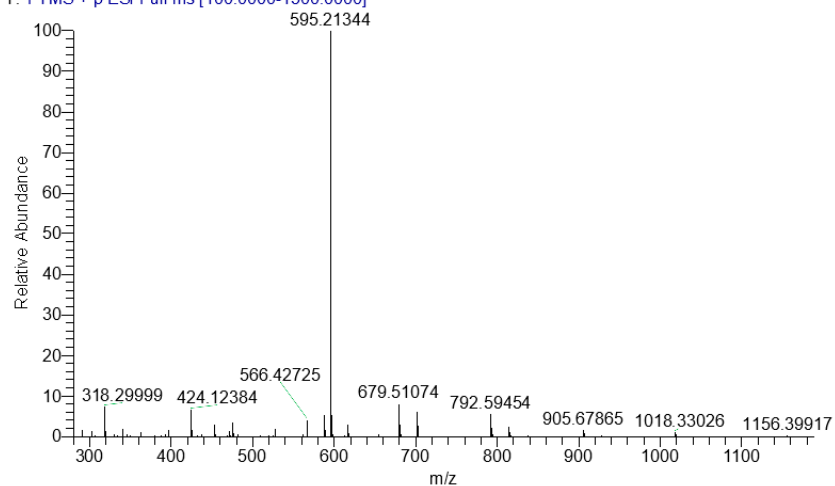



Growth percents of **8f** against 59 tumor cells in NCI-60 program

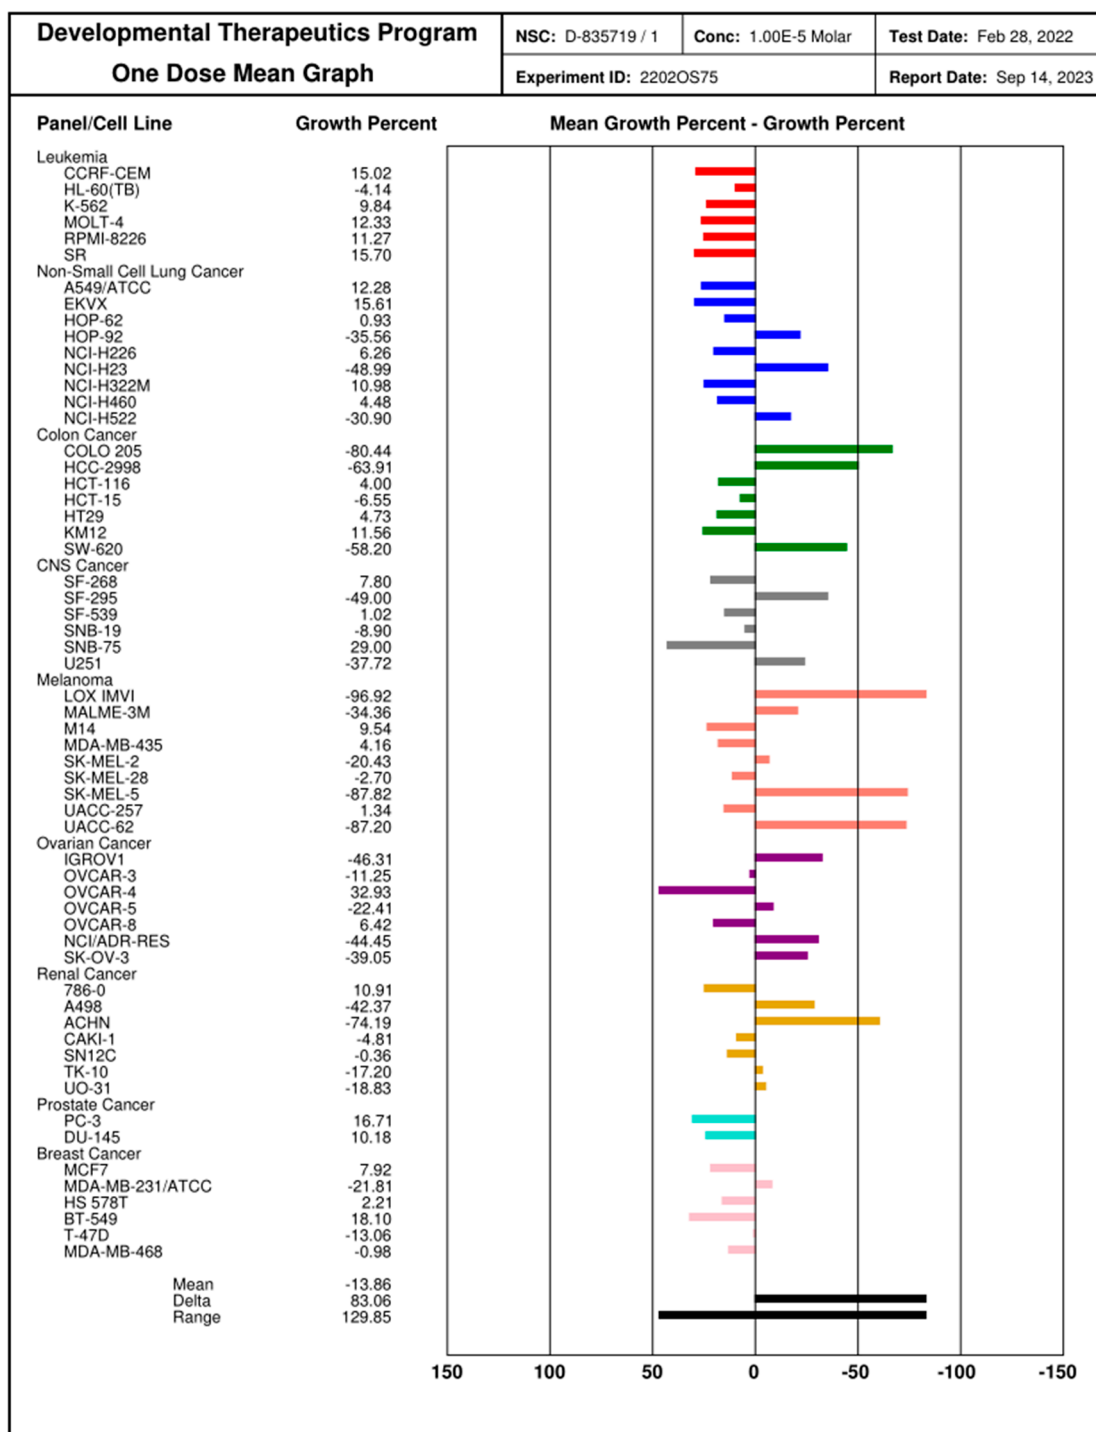

Supplement: s1 [file s1]
